1     **Mapping vegetation types in Antarctic Peninsula and South Shetlands islands using**  
2             **Sentinel-2 images and Google Earth Engine cloud computing**

3

4     Eliana Lima da Fonseca<sup>1\*</sup>, Edvan Casagrande dos Santos<sup>2</sup>, Anderson Ribeiro de Figueiredo<sup>3</sup>,  
5                                     Jefferson Cardia Simões<sup>4,5</sup>

6

7     <sup>1</sup> Centro Polar e Climático and Department of Geography, Universidade Federal do Rio  
8     Grande do Sul, Brazil. E-mail: [eliana.fonseca@ufrgs.br](mailto:eliana.fonseca@ufrgs.br). ORCID: [https://orcid.org/0000-0002-](https://orcid.org/0000-0002-9129-2939)  
9     [9129-2939](https://orcid.org/0000-0002-9129-2939)

10    <sup>2</sup> Graduate Program in Geosciences, Universidade Federal do Rio Grande do Sul, Brazil.  
11    ORCID: <https://orcid.org/0000-0001-8008-2509>

12    <sup>3</sup> Centro Polar e Climático and Graduate Program in Geography, Universidade Federal do Rio  
13    Grande do Sul, Brazil. ORCID: <https://orcid.org/0000-0002-0228-249X>

14    <sup>4</sup> Centro Polar e Climático and Department of Geography, Universidade Federal do Rio  
15    Grande do Sul, Brazil. ORCID: <https://orcid.org/0000-0001-5555-3401>

16    <sup>5</sup> Climate Change Institute, University of Maine, Orono, ME, USA

17    \* Correspondent author

18

19

20    **Abstract:** The Antarctic vegetation maps are usually made using very high-resolution images  
21    collected by orbital sensors or unmanned aerial vehicles, generating isolated maps with  
22    information valid only for the time of image acquisition. In the context of global  
23    environmental change, mapping the current Antarctic vegetation distribution on a regular  
24    basis is necessary for a better understanding of the changes in this fragile environment. This

25 work aimed to generate validated vegetation maps for the North Antarctic Peninsula and  
26 South Shetlands Islands based on Sentinel-2 images using cloud processing. Sentinel-2  
27 imagery level 1C, acquired between 2016 and 2021 (January-April), were used. Land pixels  
28 were masked with the minimum value composite image for the "water vapor" band. The  
29 NDVI maximum value composite image was sliced, and its classes were associated with the  
30 occurrence of algae (0.15 – 0.20), lichens (0.20 – 0.50), and mosses (0.50 – 0.80). The  
31 vegetation map was validated by comparing it with those from the literature. The present  
32 study showed that Sentinel-2 images allow building a validated vegetation type distribution  
33 map for Antarctica Peninsula and South Shetlands Islands.

34

35 **Keywords:** Biological soil crusts; NDVI; Google Earth Engine; spectral profiles; mosses;  
36 algae; lichens

37

## 38 **1. Introduction**

39 The vegetation in the Antarctic environment is restricted to ice-free areas, mainly in  
40 the Antarctic islands and in the coastal areas of the continent regions (Alberdi et al., 2002;  
41 Convey, 2006; Fretwell et al., 2011). These plant communities are predominantly  
42 cryptogamic, also known as lower plants or biological soil crusts (BSC) (Convey, 2010), and  
43 their growth season length depends on the climatic conditions, latitude, and relief (Selkirk &  
44 Skotnicki, 2007). The availability of liquid water is the most critical factor for the  
45 development of vegetation communities in Antarctica, which is available during few months  
46 when snow melts and summers rain occurs, or when the humidity can be absorbed directly  
47 from the air (Elster, 2002; Bölter et al., 2002; Choi et al., 2015). As a result, the expansion of

48 vegetated areas occurs at a very slow rate in the Antarctic Maritime region (Fritsen & Priscu,  
49 1998; Convey, 2006).

50         The use of remote sensing data to map Antarctic vegetation is concentrated in areas  
51 frequently visited by researchers (Calviño-Cancela & Martin-Herrero, 2016), usually made at  
52 local scales, with very-high-resolution images collected by orbital sensors, such as  
53 KOMPSAT-2 and QuickBird (Shin et al., 2014) and WorldView-2 (Jawak et al., 2019) and  
54 with unmanned aerial vehicles (UAV) (Miranda et al., 2020; Sotille et al., 2020). These studies  
55 primarily focused on detecting the presence/absence of vegetation, generating maps with  
56 information valid only for the time of image acquisition. At regional scales, based on Landsat  
57 Image Mosaic of Antarctica (LIMA mosaic) generated using images acquired between  
58 2007/2008, Fretwell et al. (2011) mapped the probability of vegetation occurrence for the  
59 Antarctic Peninsula.

60         In the context of global environmental change, mapping the current Antarctic  
61 vegetation distribution is required to understand the impact of these changes on vegetation  
62 biomass accumulation and the greenhouse gas cycle in the near future. Even in recent  
63 literature, the Antarctic vegetation is not considered in global forecasts (e.g., Jung et al., 2021)  
64 due to the lack of information over this region. A valid vegetation map can be used as an  
65 input layer in simulations processes about environmental changes, besides, it is analyzed by  
66 itself content. This work aimed to generate a set of validated vegetation maps for the northern  
67 Antarctic Peninsula and South Shetlands based on Sentinel-2 images using Google Earth  
68 Engine (GEE) data catalog and cloud processing (Gorelick et al., 2017).

69

70

71

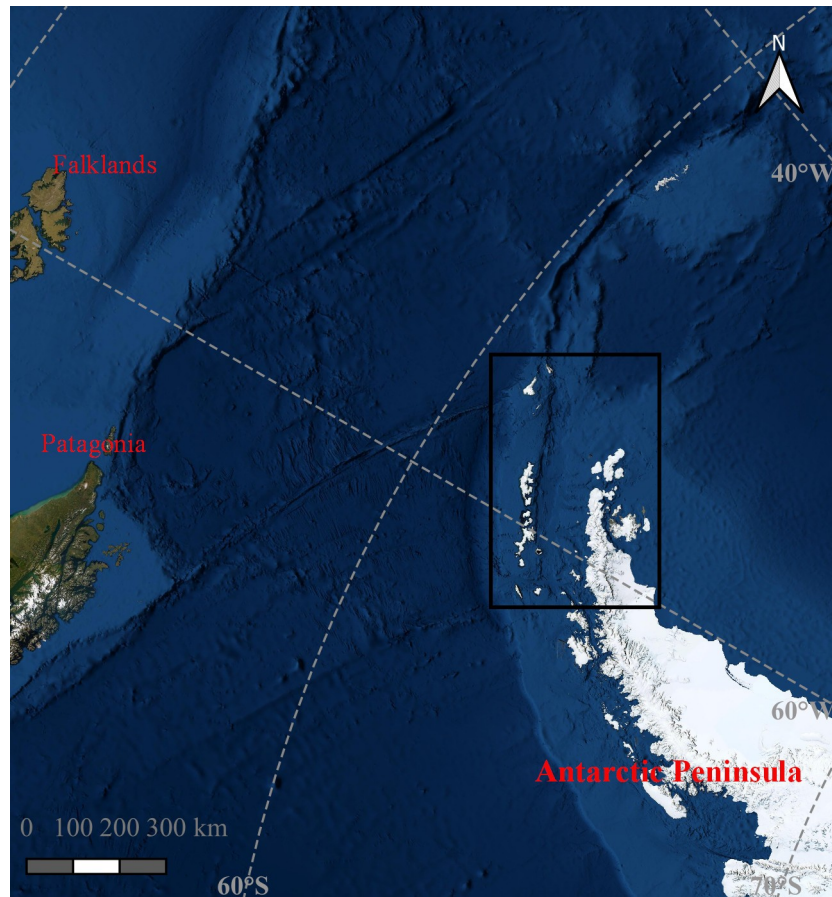

72

Figure 1 - Northern Antarctic Peninsula and South Shetlands (black rectangle) over

73 ESRI satellite basemap.

74

## 75 **2. Methods**

### 76 **2.1 Dataset**

77

The dataset was composed of all images acquired by Sentinel 2A and 2B over the

78

northern portion of the Antarctic Peninsula and its surrounding islands and South Shetlands

79

islands from 2016 until 2021 (images taken from January to April). The Sentinel-2 images at

80

level 1C (i.e., orthorectified and radiometrically corrected at the top-of-atmosphere (TOA)

81

reflectance) were available at Google Earth Engine (GEE), identified as "COPERNICUS/S2".

82

These images contain the TOA reflectance values calculated for each Sentinel-2 spectral band

83

and quality assessment (QA) bands (allowing access to ice-free and cloud-free pixels only).

84 The TOA reflectance product was used instead of the surface reflectance product due to the  
85 high spectral absorption and scattering of ocean optical constituents (IOCCG, 2020), that  
86 making with the atmospheric correction models in coastal areas did not work properly  
87 (Warren et al., 2019), which alters the reflectance patterns (Kiselev et al., 2014).

88 Monthly meteorological data, such as total precipitation, mean air temperature, and  
89 total net shortwave radiation, were used to describe the differences between mapped areas  
90 over different regions. These data were obtained using the GEE, from  
91 "ERA5\_LAND/MONTHLY" data collection, which provides aggregated values for each  
92 month from ECMWF/ERA5 climate reanalysis, which are available as supplementary  
93 material.

94

## 95 **2.2 Ocean/land mask generation**

96 An ocean/land mask was built over the area using the "water vapor band" (B9),  
97 centered at 945nm and 943.2nm for Sentinel 2A and 2B, with 60 meters spatial resolution. At  
98 these wavelengths, the water reflectance is null, allowing the separation of water and non-  
99 water pixels. For the same wavelengths, the cloud and snow reflectance is around 0.7 (Jansen,  
100 2000). For automatic vegetation mapping, mask the ocean areas is required once the  
101 phytoplankton at the ocean also made photosynthesis, and can be mapped as vegetation over  
102 the ocean areas, as observed by Fretwell et al. (2011). Using all the available images since  
103 January 1, 2016, a minimum value composite image for B9 was computed for the entire area  
104 by selecting its minimum value registered for each pixel for the whole time series. With this  
105 approach, every water pixel acquired without ice cover, cloud cover, or phytoplankton, at  
106 least once during the time series, will be filled with TOA reflectance value near zero due to its  
107 spectral reflectance pattern (Jansen, 2000), allowing the water pixels identification.

108

### 109 **2.3 Vegetation maps from NDVI images**

110 The NDVI images were calculated using Sentinel-2 bands (B4 and B8), located at  
111 red and near infra-red wavelengths, with 10 meters spatial resolution. The Sentinel-2 cloud-  
112 mask and ice-snow mask filters cannot be appropriately applied over this region, whether  
113 built using QA60 band or from QA10 and QA20 bands. When these masks were applied over  
114 a Sentinel-2 image acquired over the Antarctic Peninsula and South Shetlands, it masked all  
115 image pixels, returning only empty pixels instead of the TOA reflectance values.

116 To avoid the influence of cloud and snow pixels on NDVI values, a maximum value  
117 composite image was computed using all the available images collected over the study area  
118 from January 1 to April 30. These are the summer/autumn months in the Southern  
119 hemisphere, which are related to the vegetation growth season in the Antarctic environment  
120 (Alberdi et al., 2002; Elster, 2002; Lewis-Smith, 2007; Selkirk & Skotnicki, 2007). This  
121 approach is based on NDVI proprieties, and its values range, between -1 and 0, for water, ice,  
122 clouds, and clouds shadows and between 0 and 1 for bare areas and vegetation. A unique  
123 NDVI maximum value composite image was computed using all the available images  
124 between January and April for the analyzed period (2016 – 2021), which is used to generate  
125 the final vegetation map of the northern Antarctic Peninsula and South Shetlands. Also, a  
126 NDVI maximum value composite image was computed for each analyzed year to generate  
127 vegetation maps on an annual basis. Each NDVI maximum value composite image had its  
128 values sliced into 21 classes, the first class for the negative values and the positive values  
129 were sliced for each 0.05 until 1. A binary mask for each class was built and used to recover  
130 reflectance information that allows its vegetation type identification. The NDVI classes were  
131 labeled as mosses, lichens or algae, for generating the vegetation map.

132           The vegetation type identification was made using a Sentinel-2 image, acquired on  
133 February 23, 2019, from Surface Reflectance Sentinel-2 product (COPERNICUS/S2\_SR),  
134 available at the GEE data catalog. The option of using surface reflectance data was due to the  
135 availability of information from the literature that considers surface reflectance data to BSC  
136 target identification. Also, the availability of a Sentinel-2 cloud-free image acquired over  
137 Harmony Point (Figure 2a) for the same month when field information was collected was  
138 considered. The fieldwork was carried out on February 13 - 20, 2015, when information about  
139 vegetation cover type (algae, lichens, or mosses) was collected over 19 samples points in the  
140 Harmony Point. The surface reflectance profiles using Sentinel-2 bands located at blue, green,  
141 red, red-edge, NIR, and SWIR wavelengths were generated for each NDVI class and  
142 compared with field dataset and literature review (Lovelock & Robinson, 2002; Zhang et al.,  
143 2007).

144           To generate the vegetation maps eleven subsets were created, being four for the  
145 northern Antarctic Peninsula (south peninsula, north peninsula, north islands, west islands)  
146 and seven for the South Shetlands Islands (Elephant and Clarence, King George, Nelson,  
147 Robert, Livingston, Deception, Smith, and Low). The vegetation maps were validated by  
148 comparing with results from Andrade et al. (2018) and Sun et al. (2021) over Fildes Peninsula  
149 and Ardley Island (Figure 2b) and Shin et al. (2014) over Barton Peninsula (Figure 2c).

150

151



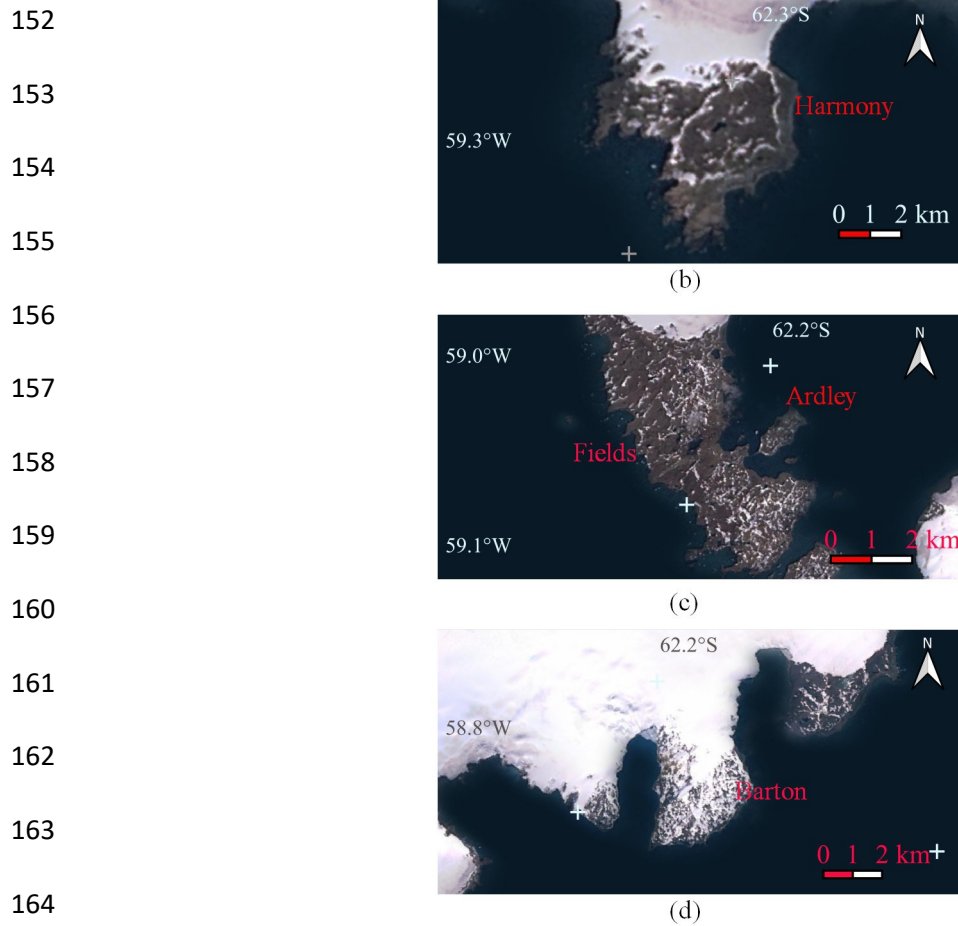

166 Figure 2 - Harmony Point (a), Fildes Peninsula and Ardley Island (b), and Barton  
167 Peninsula (c) over ESRI satellite basemap.

168

### 169 3. Results

#### 170 3.1. Masking vegetation pixels

171 The B9 minimum value composite image had its values remapped, building a binary  
172 image used as ocean/land mask, labeling those pixels with values lower than 120 as water and  
173 all others pixels as non-water. Figure 3 shows an example of the land areas vector edges from  
174 the Antarctic Digital Database, available at Quantarctica packaged (Matsuoka et al., 2021),



175 plotted over the Sentinel-2 color composite image and a monochromatic NDVI image clipped  
176 using the generated ocean/land mask.  
177

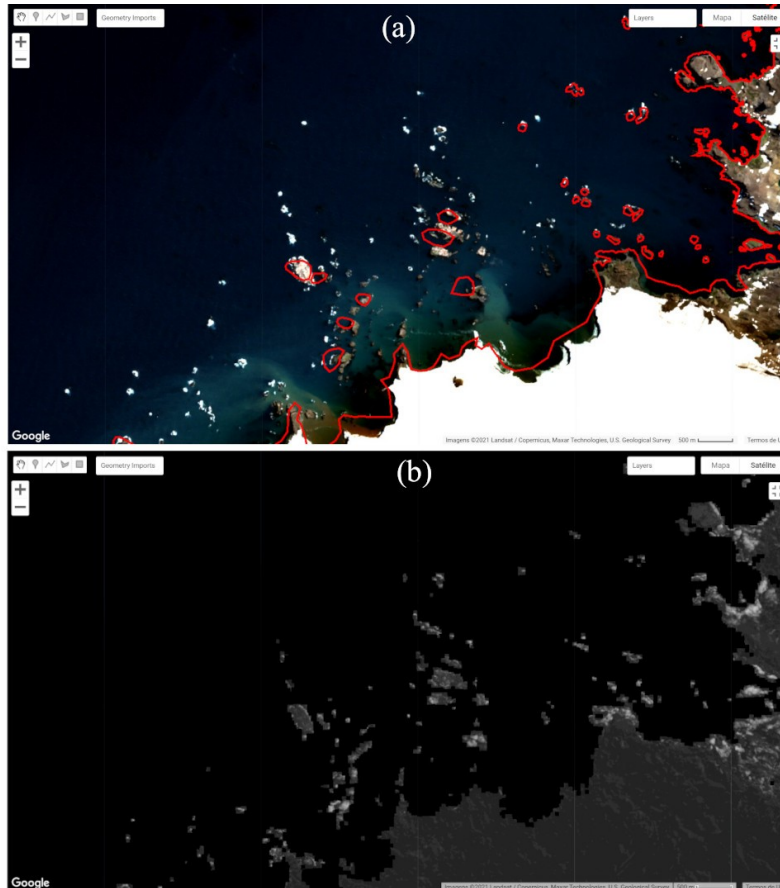

178

179

180 Figure 3 – GEE screenshot at the border of Nelson Island with (a) land areas vector  
181 edges from Antarctic Digital Database plotted over the Sentinel-2 image, and (b)  
182 monochromatic NDVI Sentinel-2 image clipped using the ocean/land mask.

183

### 184 3.2 Vegetation class labels

185 Over the Harmony point, the NDVI values associated with vegetated areas ranged  
186 from 0.15 to 0.8. The surface reflectance values for the optical bands at blue, green, red, red

187 edge, NIR, and SWIR wavelengths collected over each NDVI class are given in Table 1. The  
 188 vegetation pixels were labeled as algae when NDVI values were between 0.15 – 0.20, lichens  
 189 for 0.20 – 0.50, and mosses for 0.50 – 0.80.

190

191 Table 1 – Mean surface reflectance values for each spectral band collected over a  
 192 Sentinel-2 image acquired on February 23, 2019, for each NDVI class at Harmony Point.

193

| NDVI class<br>interval | 0.426-<br>0.558 /<br>B2 /<br>Blue | 0.523-<br>0.595 /<br>B3 /<br>Green | 0.634-<br>0.696 /<br>B4 /<br>Red | 0.688-<br>0.720 /<br>B5 /<br>Red<br>Edge | 0.724-<br>0.754 /<br>B6 /<br>Red<br>Edge | 0.760-<br>0.800 /<br>B7 /<br>Red<br>Edge | 0.727-<br>0.939 /<br>B8 /<br>NIR | 0.842-<br>0.886 /<br>B8A /<br>NIR | 1.516-<br>1.705 /<br>B11 /<br>SWIR | 2.001-<br>2.371 /<br>B12 /<br>SWIR |
|------------------------|-----------------------------------|------------------------------------|----------------------------------|------------------------------------------|------------------------------------------|------------------------------------------|----------------------------------|-----------------------------------|------------------------------------|------------------------------------|
| 0.15 - 0.20            | 0.12                              | 0.14                               | 0.14                             | 0.16                                     | 0.18                                     | 0.18                                     | 0.20                             | 0.19                              | 0.21                               | 0.16                               |
| 0.20 - 0.25            | 0.08                              | 0.10                               | 0.11                             | 0.13                                     | 0.15                                     | 0.16                                     | 0.18                             | 0.18                              | 0.25                               | 0.17                               |
| 0.25 - 0.30            | 0.07                              | 0.09                               | 0.10                             | 0.13                                     | 0.15                                     | 0.17                                     | 0.19                             | 0.19                              | 0.27                               | 0.18                               |
| 0.30 - 0.35            | 0.07                              | 0.09                               | 0.10                             | 0.13                                     | 0.16                                     | 0.18                                     | 0.20                             | 0.20                              | 0.27                               | 0.18                               |
| 0.35 - 0.40            | 0.07                              | 0.09                               | 0.10                             | 0.13                                     | 0.17                                     | 0.19                                     | 0.21                             | 0.21                              | 0.29                               | 0.19                               |
| 0.40 - 0.45            | 0.06                              | 0.09                               | 0.10                             | 0.13                                     | 0.17                                     | 0.20                                     | 0.22                             | 0.22                              | 0.29                               | 0.19                               |
| 0.45 - 0.50            | 0.06                              | 0.08                               | 0.09                             | 0.13                                     | 0.18                                     | 0.21                                     | 0.24                             | 0.24                              | 0.31                               | 0.20                               |
| 0.50 - 0.55            | 0.05                              | 0.08                               | 0.09                             | 0.13                                     | 0.19                                     | 0.22                                     | 0.25                             | 0.25                              | 0.31                               | 0.20                               |
| 0.55 - 0.60            | 0.05                              | 0.08                               | 0.08                             | 0.13                                     | 0.20                                     | 0.24                                     | 0.28                             | 0.28                              | 0.32                               | 0.20                               |
| 0.60 - 0.65            | 0.04                              | 0.07                               | 0.07                             | 0.13                                     | 0.22                                     | 0.25                                     | 0.30                             | 0.30                              | 0.33                               | 0.20                               |
| 0.65 - 0.70            | 0.04                              | 0.07                               | 0.07                             | 0.14                                     | 0.25                                     | 0.30                                     | 0.36                             | 0.36                              | 0.33                               | 0.20                               |
| 0.70 - 0.75            | 0.03                              | 0.07                               | 0.06                             | 0.14                                     | 0.27                                     | 0.32                                     | 0.38                             | 0.38                              | 0.32                               | 0.19                               |
| 0.75 - 0.80            | 0.03                              | 0.06                               | 0.06                             | 0.13                                     | 0.26                                     | 0.32                                     | 0.37                             | 0.38                              | 0.29                               | 0.17                               |

194

195

196 **3.3 Mapped vegetation areas**

197 The final vegetation map at its full spatial resolution can be accessed by  
198 running the script inside the GEE platform, which the link is available as supplementary  
199 material. The mapped areas for the final vegetation map and for all analyzed years are  
200 presented in Tables 2 and 3. Over Antarctic Peninsula (Table 2) 155.7 km<sup>2</sup> of vegetation areas  
201 were mapped, and the algae are the most abundant vegetation type for all subsets. Over South  
202 Shetlands (Table 3), 60.4 km<sup>2</sup> of vegetation areas were mapped, and the lichens were the most  
203 abundant vegetation type among all subsets.

204

205 Table 2 – Mapped vegetation areas (km<sup>2</sup>) for algae (AL), lichens (LI), and mosses  
206 (MO) over the Antarctic Peninsula subsets for the study period (2016-2021) and for the final  
207 vegetation map.

208

| Subset ID* | NP_1            |      |      | NP_2 |      |      | NP_3  |       |      | NP_4  |       |      |
|------------|-----------------|------|------|------|------|------|-------|-------|------|-------|-------|------|
|            | Vegetation type | AL   | LI   | MO   | AL   | LI   | MO    | AL    | LI   | MO    | AL    | LI   |
| 2016       | 2.80            | 2.00 | 0.02 | 1.32 | 1.23 | 0.07 | 4.81  | 6.58  | 0.18 | 11.60 | 7.39  | 0.74 |
| 2017       | 0.57            | 0.24 | 0.00 | 0.85 | 0.44 | 0.00 | 3.11  | 4.29  | 0.02 | 3.06  | 0.97  | 0.00 |
| 2018       | 2.51            | 1.29 | 0.00 | 1.53 | 0.57 | 0.00 | 3.10  | 4.01  | 0.03 | 8.81  | 3.22  | 0.00 |
| 2019       | 1.48            | 2.17 | 0.01 | 1.24 | 0.86 | 0.00 | 4.47  | 4.85  | 0.16 | 8.23  | 4.82  | 0.07 |
| 2020       | 0.45            | 0.30 | 0.00 | 1.55 | 0.70 | 0.00 | 5.69  | 4.40  | 0.06 | 18.29 | 8.08  | 0.02 |
| 2021       | 2.96            | 1.72 | 0.01 | 3.81 | 2.14 | 0.01 | 9.44  | 5.80  | 0.01 | 30.99 | 18.52 | 0.08 |
| Final map  | 9.26            | 6.21 | 0.04 | 8.37 | 4.51 | 0.08 | 16.15 | 12.54 | 0.40 | 64.81 | 32.43 | 0.88 |

209 \* NP\_1 south peninsula, NP\_2 north peninsula, NP\_3 north islands, NP\_4 west islands

210

211 Table 3 – Mapped vegetation areas (km<sup>2</sup>) for algae (AL), lichens (LI), and mosses

212 (MO) over South Shetlands islands subsets for the study period (2016-2021) and for the final

213 vegetation map.

214

| Subset ID*      | SS_1 |      |      | SS_2 |      |      | SS_3 |      |      | SS_4 |      |      | SS_5 |      |      | SS_6 |      |      | SS_7 |      |      |
|-----------------|------|------|------|------|------|------|------|------|------|------|------|------|------|------|------|------|------|------|------|------|------|
| Vegetation type | AL   | LI   | MO   | AL   | LI   | MO   | AL   | LI   | MO   | AL   | LI   | MO   | AL   | LI   | MO   | AL   | LI   | MO   | AL   | LI   | MO   |
| 2016            | 0.25 | 0.11 | 0.00 | 1.94 | 3.45 | 0.06 | 0.67 | 1.60 | 0.02 | 1.33 | 2.74 | 0.05 | 1.56 | 1.69 | 0.01 | 0.62 | 0.51 | 0.00 | 0.99 | 0.92 | 0.00 |
| 2017            | 0.25 | 0.11 | 0.00 | 2.35 | 3.63 | 0.13 | 0.74 | 2.21 | 0.12 | 1.78 | 4.65 | 0.21 | 1.43 | 1.75 | 0.06 | 1.10 | 1.22 | 0.02 | 0.13 | 0.04 | 0.00 |
| 2018            | 1.24 | 1.64 | 0.02 | 2.18 | 4.89 | 0.28 | 0.71 | 2.27 | 0.15 | 1.19 | 3.55 | 0.26 | 0.28 | 0.21 | 0.00 | 0.08 | 0.09 | 0.00 | 0.54 | 0.64 | 0.00 |
| 2019            | 0.14 | 0.09 | 0.00 | 0.29 | 0.32 | 0.00 | 0.20 | 0.34 | 0.00 | 1.46 | 4.66 | 0.35 | 1.32 | 2.22 | 0.05 | 0.23 | 0.28 | 0.00 | 0.31 | 0.35 | 0.00 |
| 2020            | 1.24 | 0.93 | 0.01 | 2.49 | 5.67 | 0.29 | 0.85 | 2.23 | 0.14 | 1.63 | 4.91 | 0.34 | 2.28 | 3.73 | 0.06 | 0.31 | 0.40 | 0.00 | 0.70 | 0.92 | 0.01 |
| 2021            | 1.37 | 1.57 | 0.08 | 2.26 | 4.77 | 0.15 | 1.11 | 2.17 | 0.11 | 1.77 | 3.07 | 0.14 | 2.93 | 4.71 | 0.08 | 1.55 | 1.19 | 0.00 | 1.01 | 1.03 | 0.02 |
| Final map       | 3.40 | 4.56 | 0.12 | 4.52 | 8.33 | 0.47 | 1.43 | 3.16 | 0.23 | 2.74 | 6.95 | 0.54 | 5.11 | 8.14 | 0.17 | 2.98 | 2.57 | 0.02 | 2.38 | 2.53 | 0.03 |

215 \* SS\_1: Elephant and Clarence, SS\_2: King George, SS\_3: Nelson, SS\_4: Robert, SS\_5: Livingston, SS\_6:

216 Deception, SS\_7: Smith and Low

217

#### 218 4. Discussion

219 Despite the availability of a long-term Landsat image series collected over the

220 Antarctic at official datasets repositories, those images also do not have a correct

221 georeferencing over the Antarctic, being the reason for the nonexistence of vegetation map

222 over this region on a regular basis. The Sentinel-2 imagery is georeferenced using the

223 Copernicus Precise Orbit Determination (POD), allowing georeferencing images based on  
224 satellite position at the acquired time. Thus, it solves the first fundamental problem of  
225 composing a satellite image time-series that is the correct georeferencing, which is essential  
226 for automatic data processing. The NDVI maximum value composite approach, in association  
227 with the ocean/land mask, was able to eliminate the cloud and cloud-shadows pixels and  
228 excluding those pixels from phytoplankton over the ocean, allowing the continuity of  
229 automatic processes.

230         The NDVI values over 0.15 to map vegetation distribution is similar to the observed  
231 by Fretwell et al. (2011), who associated NDVI values higher than 0.20 with vegetation pixels  
232 for Antarctic Peninsula using Landsat images. Algae presented lower NDVI values, similar as  
233 observed by Yun et al. (2017). The increase in reflectance values at the red edge and NIR  
234 wavelengths did the criteria for separating mosses and lichens (Lovelock & Robinson, 2002;  
235 Zhang et al., 2007).

236         The subsets have different area dimensions and, hence, a direct quantitative  
237 comparison of the maps is not possible. However, a high vegetation area mapped at subset  
238 NP\_4 locate over the west islands can be noticed (Table 2), similar to results from Fretwell et  
239 al. (2011) over the same region. Furthermore, it can be observed that a great total net  
240 shortwave radiation amount at subset NP\_4 in relation with other subsets (Supplementary  
241 material), evidencing a microenvironment over this region that provided vegetation growth  
242 conditions. Zhou et al. (2021) also detected these microenvironment effects using remote  
243 sensing techniques to monitor the environmental changes, such as dry-snow line variations.  
244 Also, they were pointed out as one of the driving forces to other environmental changes (e.g.,  
245 changes in phytoplankton communities) (Ferreira et al., 2020). Over the South Shetlands

246 Islands, no relationships among vegetation distribution and the weather variables or the  
247 geographic location were found.

248           The annual variations in mapped vegetation areas observed among analyzed years  
249 (Tables 2 and 3) cannot be considered as a land cover change in this region. As pointed out by  
250 Shin et al. (2014), some variations in vegetation abundance in relation with the month of data  
251 acquisition and interannual meteorological conditions are expected, but not for the vegetation  
252 distribution area, since the expansion of vegetated areas occurs at a very slow rate in the  
253 Antarctic (Fritsen & Priscu, 1998; Convey, 2006). The differences in mapped vegetation areas  
254 among years can be observed in Figure 4, where the annual maps over Fildes Peninsula and  
255 Ardley Island are presented. Since no weather variations among the years were found over  
256 this area, these variations observed are, in fact, due to the cloud cover, which justifies the use  
257 of images acquired in more than one year to build a valid vegetation map from Sentinel-2  
258 images.

259

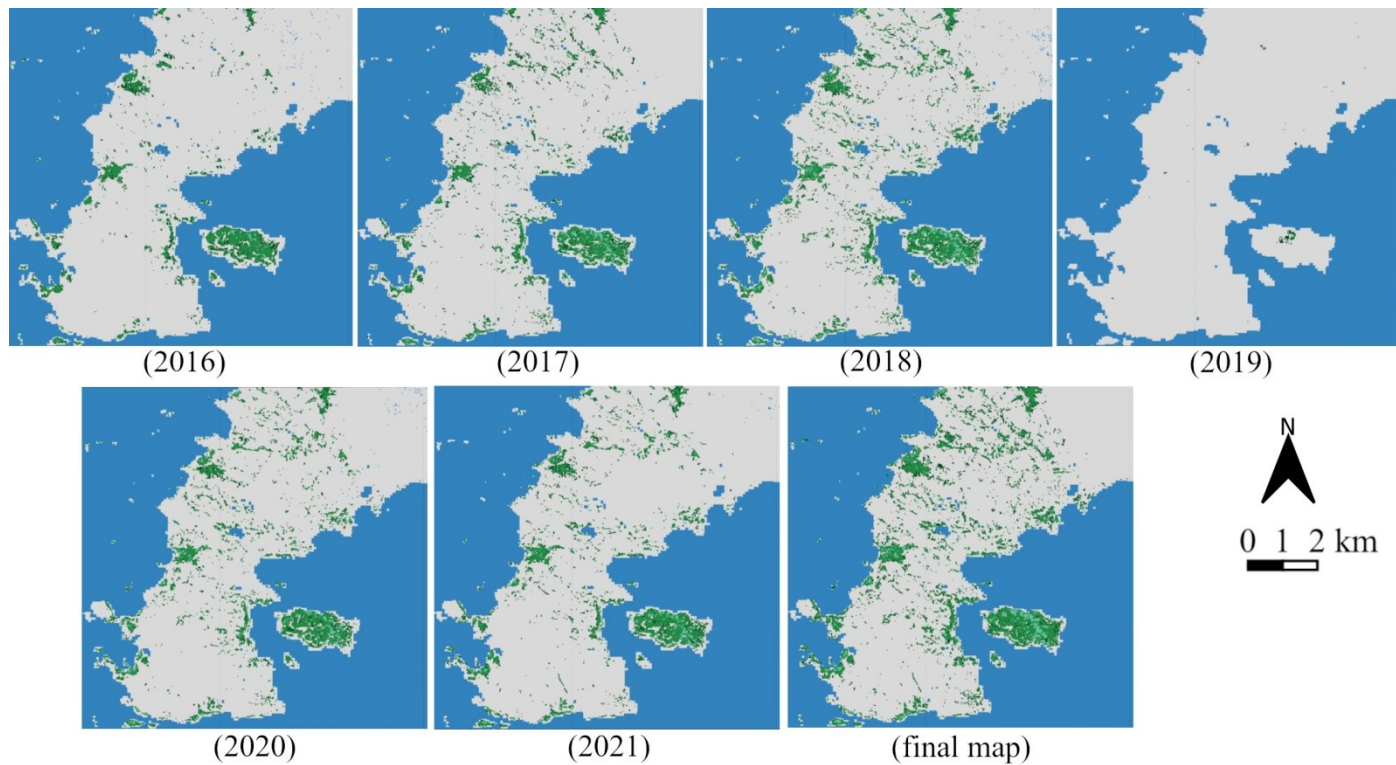

260

261

262 Figure 4 – The annual vegetation distribution maps over Fildes Peninsula and Ardley  
263 Island for the study period (2016-2021) and for the final vegetation map.

264

#### 265 **4.1. Vegetation map validation**

266 Over the Fildes Peninsula and Ardley Island, the final vegetation map (Figure 5a)  
267 were compared with results from Sun et al. (2021), who estimated the areas dominated by  
268 mosses and lichens using spectral mixture analysis with a WorldView-2 image and field  
269 measurements and with results from Andrade et al. (2018) who mapped the vegetation using a  
270 QuickBird image. Over Ardley Island, an area of 0.106 km<sup>2</sup> was estimated as occupied by  
271 algae, 0.659 km<sup>2</sup> by lichens, and 0.212 km<sup>2</sup> by mosses. Sun et al. (2021) mapped lichens and  
272 mosses and estimated 0.3259 km<sup>2</sup> covered by mosses. Andrade et al. (2018) mapped two  
273 different classes, one for mosses (0.3165 km<sup>2</sup>) and the other for lichens and mosses



274 association (0.3804 km<sup>2</sup>). Some differences in mapped areas are expected due to the spatial  
275 resolution of the images used. Note that, in many cases, the mosses distribution estimated  
276 with WorldView-2 (Sun et al., 2021) and QuickBird (Andrade et al., 2018) were mapped as  
277 algae using Sentinel-2 images. Both mosses and algae occur at the same moist  
278 microenvironment (Becker, 1982; Broday, 1996; Lovelock & Robinson, 2002), which can  
279 explain the greater difference observed in mapped area with mosses between this work and  
280 the areas mapped by Andrade et al. (2018) and Sun et al. (2021).

281         The most relevant comparison that can be made is about vegetation spatial  
282 distribution found over Fildes Peninsula and Ardley Island that was the same in all three  
283 works, indicates that our approach to map vegetation using Sentinel-2 images with 10 meters  
284 spatial resolution (B4 and B8) are valid with good results, similar to that obtained with very-  
285 high spatial resolution images. Over the Barton Peninsula, Shin et al. (2014) mapped  
286 vegetation abundance using KOMPSAT-2 and QuickBird very-high resolution images, by  
287 spectral mixture analysis and the spatial distribution of vegetation found over this area by  
288 these authors was similar to the map generated in the present study (Figure 5b), which  
289 indicates, again, that the approach using Sentinel-2 images was able to map the vegetation  
290 over the Antarctic environment. The absence of information with correct geo-location over  
291 the Antarctic region made validating the results a complex task. Since the mapped vegetation  
292 distribution found in this work was similar to that of Shin et al. (2014), Andrade et al. (2018),  
293 and Sun et al. (2021), the NDVI range from 0.15 – 0.80 can be considered valid to map the  
294 vegetation cover over the Antarctic Peninsula and South Shetlands islands using Sentinel-2  
295 images.

296

297

298

299

300

301

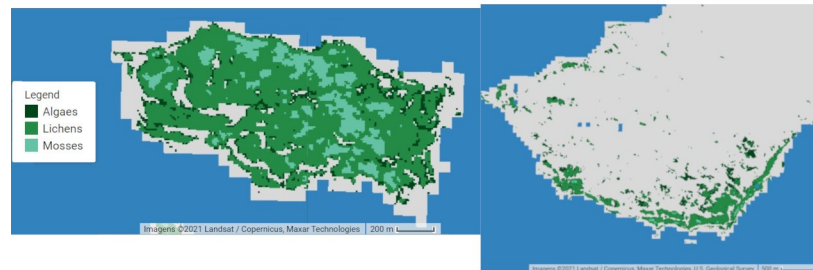

302

303

Figure 5 – Vegetation map for Ardley Island (a) and for Barton Peninsula (b)

304

305

306 **Funding:** Brazilian National Council for Scientific and Technological Development (CNPq),

307 Process 465680/2014-3 and Foundation for Research of the State of Rio Grande do Sul

308 (FAPERGS), Process 17/25510000518-0 through the Brazilian National Institute for

309 Cryospheric Sciences (INCT da Criosfera).

310

311 **Author contributions:** ELF performed the fieldwork, analyzed the data, wrote, reviewed and

312 edited the manuscript; ECS performed the literature review, analyzed the data and wrote the

313 manuscript; ARF performed the fieldwork; JCS reviewed the manuscript and acquired the

314 financial resources of this research. All authors discussed the results and approved the final

315 version of the manuscript.

316

## 317 **References**

318 Alberdi, M., Bravo, L.A., Gutiérrez, A., Gidekel, M., Corcuera, L.J., 2002. Ecophysiology of

319 Antarctic vascular plants. *Physiologia Plantarum* 115, 479–486.

320 <https://doi.org/10.1034/j.1399-3054.2002.1150401.x>

- 321 Andrade, A.M.D., Michel, R.F.M., Bremer, U.F., Schaefer, C.E.G.R., Simões, J.C., 2018.  
322 Relationship between solar radiation and surface distribution of vegetation in Fildes Peninsula  
323 and Ardley Island, Maritime Antarctica. *International Journal of Remote Sensing* 39, 2238–  
324 2254. <https://doi.org/10.1080/01431161.2017.1420937>
- 325 Becker E. W., 1988. Physiological studies on Antarctic *Prasiola crispa* and *Nostoc commune*  
326 at low temperatures. *Polar Biol* 1:99–104.
- 327 Broady, P.A. 1996. Diversity, distribution and dispersal of Antarctic terrestrial algae.  
328 *Biodivers Conserv* 5:1307-1335.
- 329 Calviño-Cancela, M., Martín-Herrero, J., 2016. Spectral Discrimination of Vegetation Classes  
330 in Ice-Free Areas of Antarctica. *Remote Sensing* 8, 856. <https://doi.org/10.3390/rs8100856>
- 331 Casanovas, P., Black, M., Fretwell, P., Convey, P., 2015. Mapping lichen distribution on the  
332 Antarctic Peninsula using remote sensing, lichen spectra and photographic documentation by  
333 citizen scientists. *Polar Research* 34, 25633. <https://doi.org/10.3402/polar.v34.25633>
- 334 Choi, S.H., Kim, S.C., Hong, S.G., Lee, K.S., 2015. Influence of microenvironment on the  
335 spatial distribution of *Himantormia lugubris* (Parmeliaceae) in ASPA No. 171, maritime  
336 Antarctic. *J. Ecol. Environ.* 38, 493–503. <https://doi.org/10.5141/ecoenv.2015.052>
- 337 Convey, P., 2006. Antarctic Terrestrial Ecosystems: Responses to Environmental Change.  
338 *Polarforschung* 11 pages. <https://doi.org/10.2312/POLARFORSCHUNG.75.2-3.101>
- 339 Convey, P., 2010. Terrestrial biodiversity in Antarctica – Recent advances and future  
340 challenges. *Polar Science* 4, 135–147. <https://doi.org/10.1016/j.polar.2010.03.003>
- 341
- 342 Elster, J. 2002. Ecological classification of terrestrial algal communities in polar  
343 environments. In: Beyer, L., Bölter, M. *Geocology of Antarctic ice-free coastal landscapes*,  
344 Berlin: Springer-Verlag, p.303-326.

345 Ferreira, A., Costa, R.R., Dotto, T.S., Kerr, R., Tavano, V.M., Brito, A.C., Brotas, V., Secchi,  
346 E.R., Mendes, C.R.B., 2020. Changes in Phytoplankton Communities Along the Northern  
347 Antarctic Peninsula: Causes, Impacts and Research Priorities. *Front. Mar. Sci.* 7, 576254.  
348 <https://doi.org/10.3389/fmars.2020.576254>

349 Fretwell, P.T., Convey, P., Fleming, A.H., Peat, H.J., Hughes, K.A., 2011. Detecting and  
350 mapping vegetation distribution on the Antarctic Peninsula from remote sensing data. *Polar*  
351 *Biol* 34, 273–281. <https://doi.org/10.1007/s00300-010-0880-2>

352 Fritsen, C.H., Priscu, J.C., 1998. Cyanobacterial assemblages in permanent ice covers on  
353 antarctic lakes: distribution, growth rate, and temperature response of photosynthesis. *J*  
354 *Phycol* 34, 587–597. <https://doi.org/10.1046/j.1529-8817.1998.340587.x>

355 Gorelick, N., Hancher, M., Dixon, M., Ilyushchenko, S., Thau, D., Moore, R., 2017. Google  
356 Earth Engine: Planetary-scale geospatial analysis for everyone. *Remote Sensing of*  
357 *Environment* 202, 18–27. <https://doi.org/10.1016/j.rse.2017.06.031>

358 IOCCG (2020). Synergy between Ocean Colour and Biogeochemical/Ecosystem Models.  
359 Dutkiewicz, S. (ed.), IOCCG Report Series, No. 19, International Ocean Colour Coordinating  
360 Group, Dartmouth, Canada.

361 Jacob, A., Kirst, G.O., Wiencke, C., Lehmann, H., 1991. Physiological responses of the  
362 Antarctic green alga *Prasiola crispa* ssp. antarctica to salinity stress. *J Plant Physiol* 139:57-  
363 62.

364 Jawak, S.D., Luis, A.J., Fretwell, P.T., Convey, P., Durairajan, U.A., 2019. Semiautomated  
365 Detection and Mapping of Vegetation Distribution in the Antarctic Environment Using  
366 Spatial-Spectral Characteristics of WorldView-2 Imagery. *Remote Sensing* 11, 1909.  
367 <https://doi.org/10.3390/rs11161909>

368 Jensen, J. R. 2000. Remote sensing of the environment: an earth resource perspective. Upper  
369 Saddle River, N.J., Prentice Hall.

370 Kappen, L., Schroeter, B. 2002. Plants and lichens in the antarctic, their way of life and their  
371 relevance to soil formation. In: Beyer, L., Bölter, M. Geocology of Antarctic ice-free coastal  
372 landscapes, Berlin: Springer-Verlag, p.327-376.

373 Kappen, L., 2000. Some aspects of the great success of lichens in Antarctica. Antarctic science  
374 12, 314–324. <https://doi.org/10.1017/S0954102000000377>

375 Kappen, L. 1993. Plant activity under snow and ice, with particular reference to  
376 lichens. Arctic, 46(4), 297-302.

377 Kiselev, V., Bulgarelli, B., Heege, T., 2015. Sensor independent adjacency correction  
378 algorithm for coastal and inland water systems. Remote Sensing of Environment 157, 85–95.  
379 <https://doi.org/10.1016/j.rse.2014.07.025>

380 Lewis-Smith R. I. 2007. Vegetation. In: Riffenburgh, B. Encyclopedia of the Antarctic. New  
381 York: Taylor & Francis Group, p. 1033-1036.

382 Lovelock, C.E., Robinson, S.A., 2002. Surface reflectance properties of Antarctic moss and  
383 their relationship to plant species, pigment composition and photosynthetic function: Surface  
384 reflectance of moss. Plant, Cell & Environment 25, 1239–1250.  
385 <https://doi.org/10.1046/j.1365-3040.2002.00916.x>

386 Matsuoka, K., Skoglund, A., Roth, G., de Pomereu, J., Griffiths, H., Headland, R., Herried,  
387 B., Katsumata, K., Le Brocq, A., Licht, K., Morgan, F., Neff, P.D., Ritz, C., Scheinert, M.,  
388 Tamura, T., Van de Putte, A., van den Broeke, M., von Deschwenden, A., Deschamps-Berger,  
389 C., Van Liefferinge, B., Tronstad, S., Melvær, Y., 2021. Quantarctica, an integrated mapping  
390 environment for Antarctica, the Southern Ocean, and sub-Antarctic islands. Environmental  
391 Modelling & Software 140, 105015. <https://doi.org/10.1016/j.envsoft.2021.105015>

- 392 Miranda, V., Pina, P., Heleno, S., Vieira, G., Mora, C., E.G.R. Schaefer, C., 2020. Monitoring  
393 recent changes of vegetation in Fildes Peninsula (King George Island, Antarctica) through  
394 satellite imagery guided by UAV surveys. *Science of The Total Environment* 704, 135295.  
395 <https://doi.org/10.1016/j.scitotenv.2019.135295>
- 396 Moniz, M.B.J., Rindi, F., Novis, P.M., Broady, P.A., Guiry, M.D., 2012. Molecular  
397 phylogeny of antarctic prasiola (prasiolales, trebouxiophyceae) reveals extensive cryptic  
398 diversity1: cryptic diversity of antarctic prasiola. *Journal of Phycology* 48, 940–955.  
399 <https://doi.org/10.1111/j.1529-8817.2012.01172.x>
- 400 Sancho, L.G., Pintado, A., 2004. Evidence of high annual growth rate for lichens in the  
401 maritime Antarctic. *Polar Biology* 27, 312–319. <https://doi.org/10.1007/s00300-004-0594-4>
- 402 Selkirk, P.M., Skotnicki, M.L., 2007. Measurement of moss growth in continental Antarctica.  
403 *Polar Biol* 30, 407–413. <https://doi.org/10.1007/s00300-006-0197-3>
- 404 Shin, J.-I., Kim, H.-C., Kim, S.-I., Hong, S.G., 2014. Vegetation abundance on the Barton  
405 Peninsula, Antarctica: estimation from high-resolution satellite images. *Polar Biol* 37, 1579–  
406 1588. <https://doi.org/10.1007/s00300-014-1543-5>
- 407 Sotille, M.E., Bremer, U.F., Vieira, G., Velho, L.F., Petsch, C., Simões, J.C., 2020.  
408 Evaluation of UAV and satellite-derived NDVI to map maritime Antarctic vegetation.  
409 *Applied Geography* 125, 102322. <https://doi.org/10.1016/j.apgeog.2020.102322>
- 410 Sun, X., Wu, W., Li, X., Xu, X., Li, J., 2021. Vegetation Abundance and Health Mapping  
411 Over Southwestern Antarctica Based on WorldView-2 Data and a Modified Spectral Mixture  
412 Analysis. *Remote Sensing* 13, 166. <https://doi.org/10.3390/rs13020166>
- 413 Warren, M.A., Simis, S.G.H., Martinez-Vicente, V., Poser, K., Bresciani, M., Alikas, K.,  
414 Spyrakos, E., Giardino, C., Ansper, A., 2019. Assessment of atmospheric correction

415 algorithms for the Sentinel-2A MultiSpectral Imager over coastal and inland waters. Remote  
416 Sensing of Environment 225, 267–289. <https://doi.org/10.1016/j.rse.2019.03.018>

417 Yun, Z., Rong-Liang, J., Yan-Hong, G., Yuan-Yuan, Z., Jia-Ling, T., 1Shapotou Desert  
418 Research and Experiment Station, Northwest Institute of Eco-Environment and Resources,  
419 Chinese Academy of Sciences, Lanzhou 730000,&lt;br /&gt; China ; 2University of Chinese  
420 Academy of Sciences, Beijing 100049, China, 2017. Characteristics of normalized difference  
421 vegetation index of biological soil crust during the succession process of artificial sand-fixing  
422 vegetation in the Tengger Desert, Northern China. Chinese Journal of Plant Ecology 41, 972–  
423 984. <https://doi.org/10.17521/cjpe.2017.0105>

424 Zhang, Y.M., Chen, J., Wang, L., Wang, X.Q., Gu, Z.H., 2007. The spatial distribution  
425 patterns of biological soil crusts in the Gurbantunggut Desert, Northern Xinjiang, China.  
426 Journal of Arid Environments 68, 599–610. <https://doi.org/10.1016/j.jaridenv.2006.06.012>

427 Zhou, C., Liu, Y., Zheng, L., 2021. Satellite-derived dry-snow line as an indicator of the local  
428 climate on the Antarctic Peninsula. J. Glaciol. 1–11. <https://doi.org/10.1017/jog.2021.72>

429
